# Supplementary material for: Optical anticounterfeiting photonic bilayer film based on handedness of solid-state helicoidal structure
Source: Royal Society of Chemistry journal article supplement (doi:10.1039/d1ra07021e), 2021-01-01
Supplement: d1ra07021e1.pdf [file d1ra07021e1.pdf]

## Optical Anticounterfeiting Photonic Bilayer Film Based on Handedness of Solid-State Helicoidal Structure

Saddam Hussain,<sup>a</sup> Sajjad Haider,<sup>b</sup> Waheed Al-Masry<sup>b</sup> and Soo-Young Park<sup>\*a</sup>

<sup>a</sup>*School of Applied Chemical Engineering, Polymeric Nano Materials Laboratory, Kyungpook National University, Daegu, 41566, Republic of Korea. E-mail: [psy@knu.ac.kr](mailto:psy@knu.ac.kr)*

<sup>b</sup>*Chemical Engineering Department, College of Engineering, King Saud University, Riyadh 11421, Saudi Arabia*

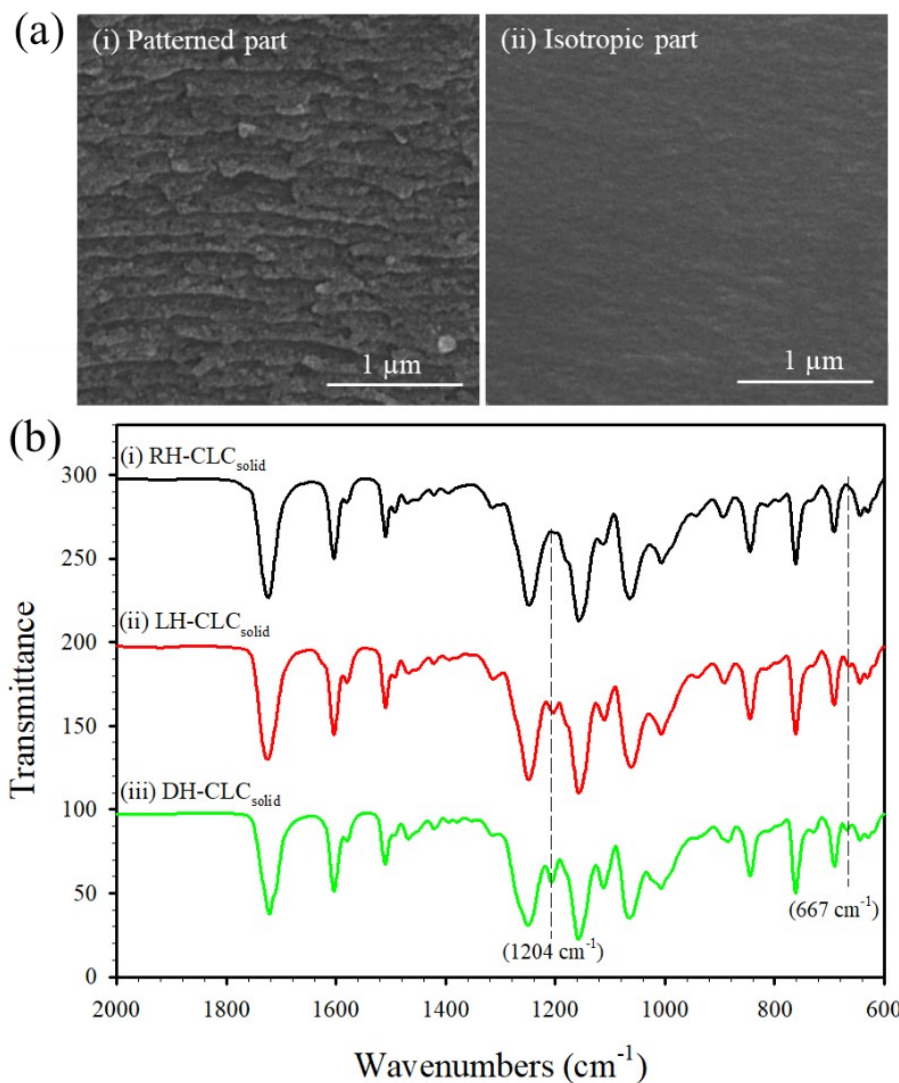

**Fig. S1** (a) SEM images of the cross-sectional surfaces of the (i) patterned and (ii) isotropic parts of the bottom RH-CLC<sub>solid</sub> film. (b) FTIR spectra of the (i) RH-, (ii) LH-, and (iii) DH-CLC<sub>solid</sub> films. The scale bars in (a) are 1 μm.

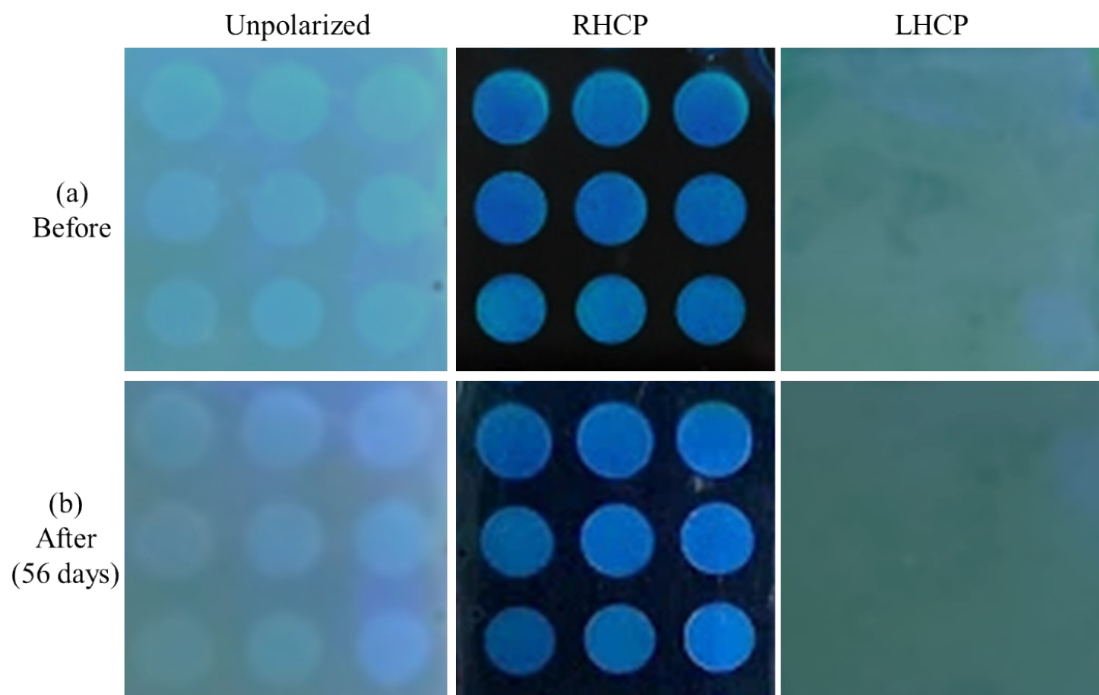

**Fig. S2.** Photographic images of the dot pattern of the DH-CLC<sub>solid</sub> film (a) immediately and (b) 56 days after preparation under unpolarized, RHCP and LHCP lights.
